# Supplementary material
Source: MDPI journal article supplement (https://www.mdpi.com/2227-9040/10/10/431)
Supplement: s1 [file s1]

Supporting Information

# Plasmonic Sensor and Surface Enhanced Fluorescence Imaging Based on Hollow Nanocone Arrays

*Pengkun Chen,<sup>1</sup> Xinyi Chen,<sup>2,3</sup> Mingyu Cheng,<sup>2,3</sup> Chuting Zhang,<sup>1</sup> Jin Cui,<sup>1\*</sup> and Bin Ai<sup>2,3\*</sup>*

<sup>1</sup>United Microelectronics Center Co., Ltd, Chongqing 401332, China

<sup>2</sup>School of Microelectronics and Communication Engineering, Chongqing University,  
Chongqing 400044, China

<sup>3</sup>Chongqing Key Laboratory of Bio perception & Intelligent Information Processing,  
Chongqing 400044, China

\*Correspondence: [jin.cui@cumec.cn](mailto:jin.cui@cumec.cn) (J.C); [binai@cqu.edu.cn](mailto:binai@cqu.edu.cn) (B.A.)

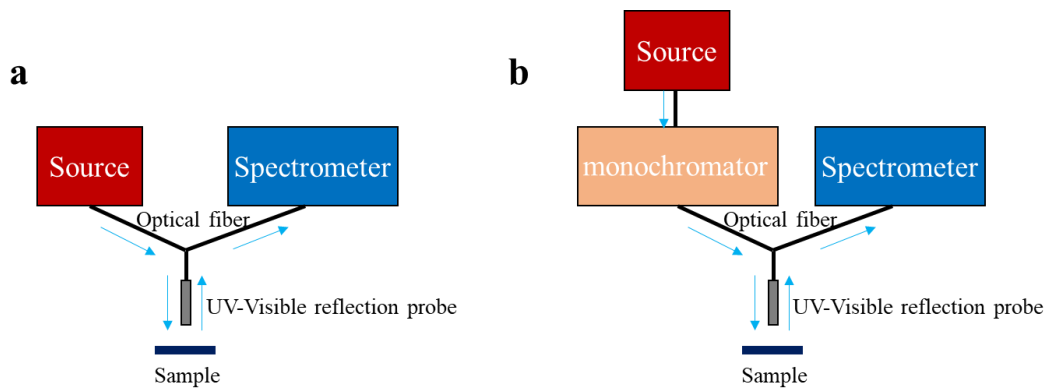

**Figure S1.** Configuration of the (a) reflectance and (b) fluorescence measurements. The blue arrows indicate the light path.

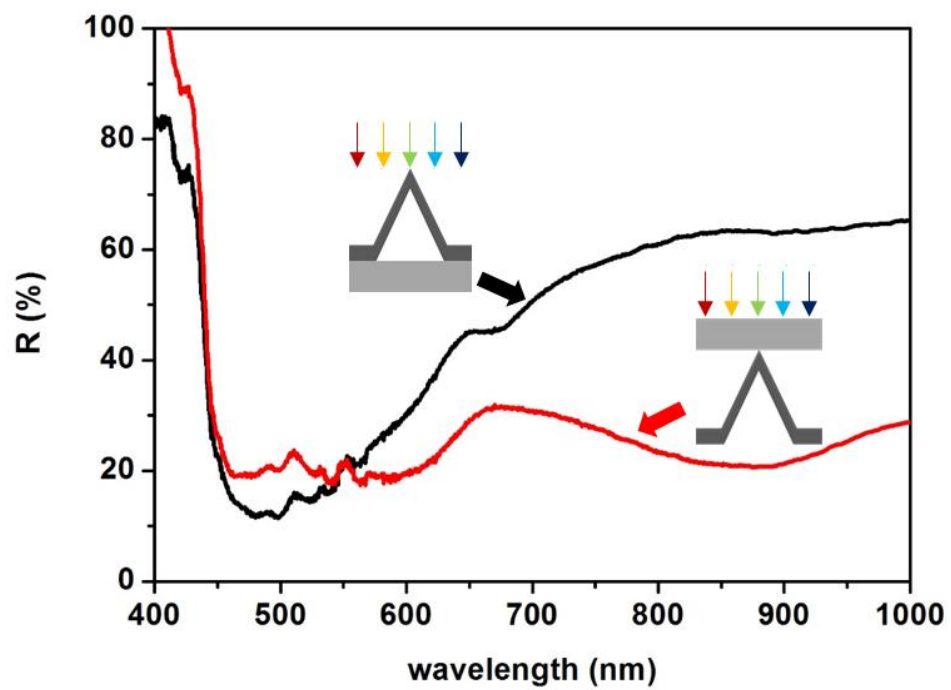

**Figure S2.** Reflection spectra of the hollow nanocone arrays for the two cases indicated by the inset images.
